# Supplementary material for: TERT promoter mutations and telomere length in adult malignant gliomas and recurrences
Source: PubMed Central journal article supplement (PMC4496380; doi:10.18632/oncotarget.3329), 2015-03-12
Supplement: oncotarget-06-10617-s001.pdf [file oncotarget-06-10617-s001.pdf]

## SUPPLEMENTARY FIGURES AND TABLES

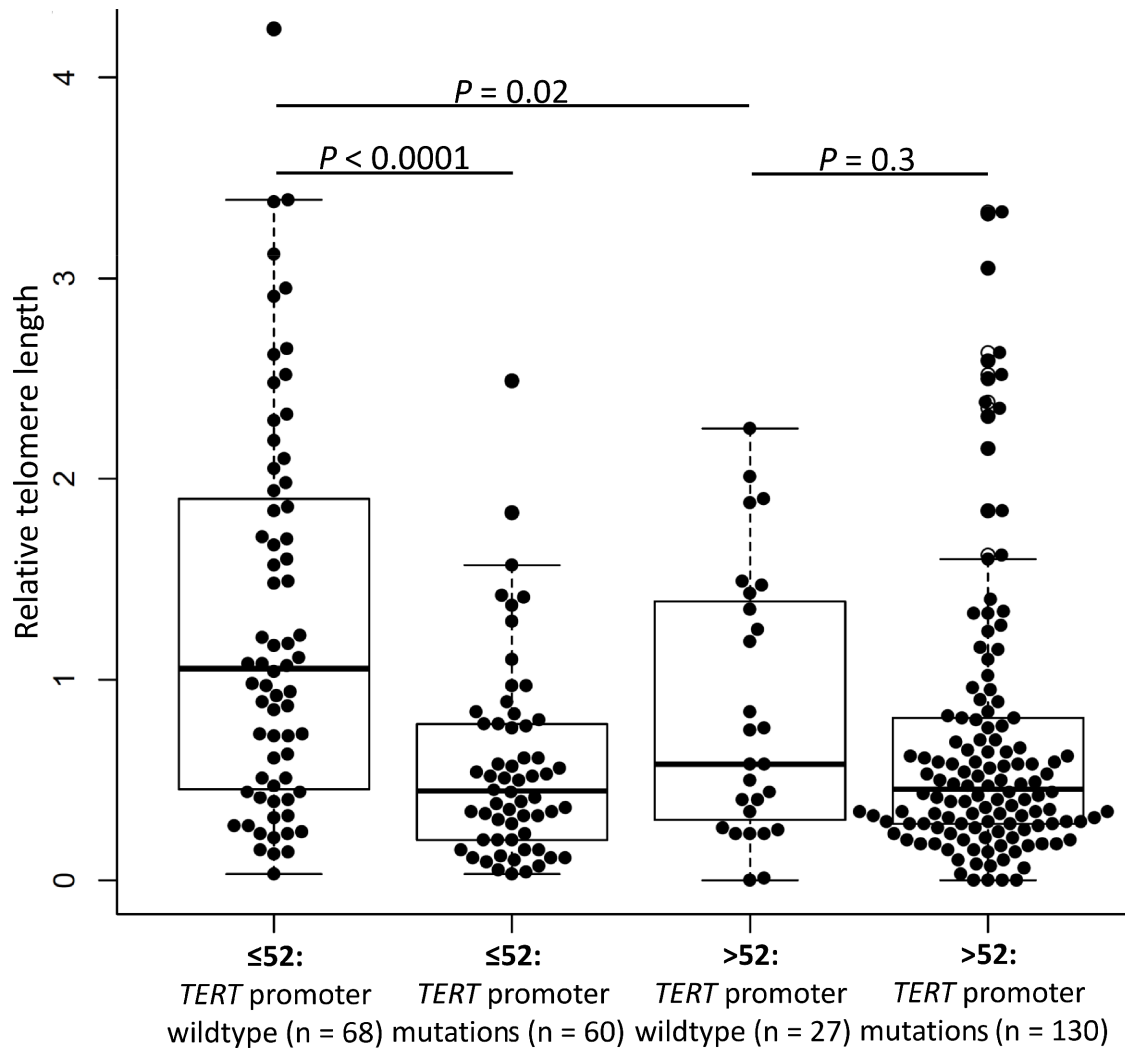

**Supplementary Figure 1: Telomere lengths in glioma tumors stratified according to age.** Relative telomere length in gliomas without and with *TERT* promoter mutations, stratified according to median age of the patients. Experiments were carried out in triplicate and box plots represent mean  $\pm$  s.e.m. *P*-values were determined by *t*-test.

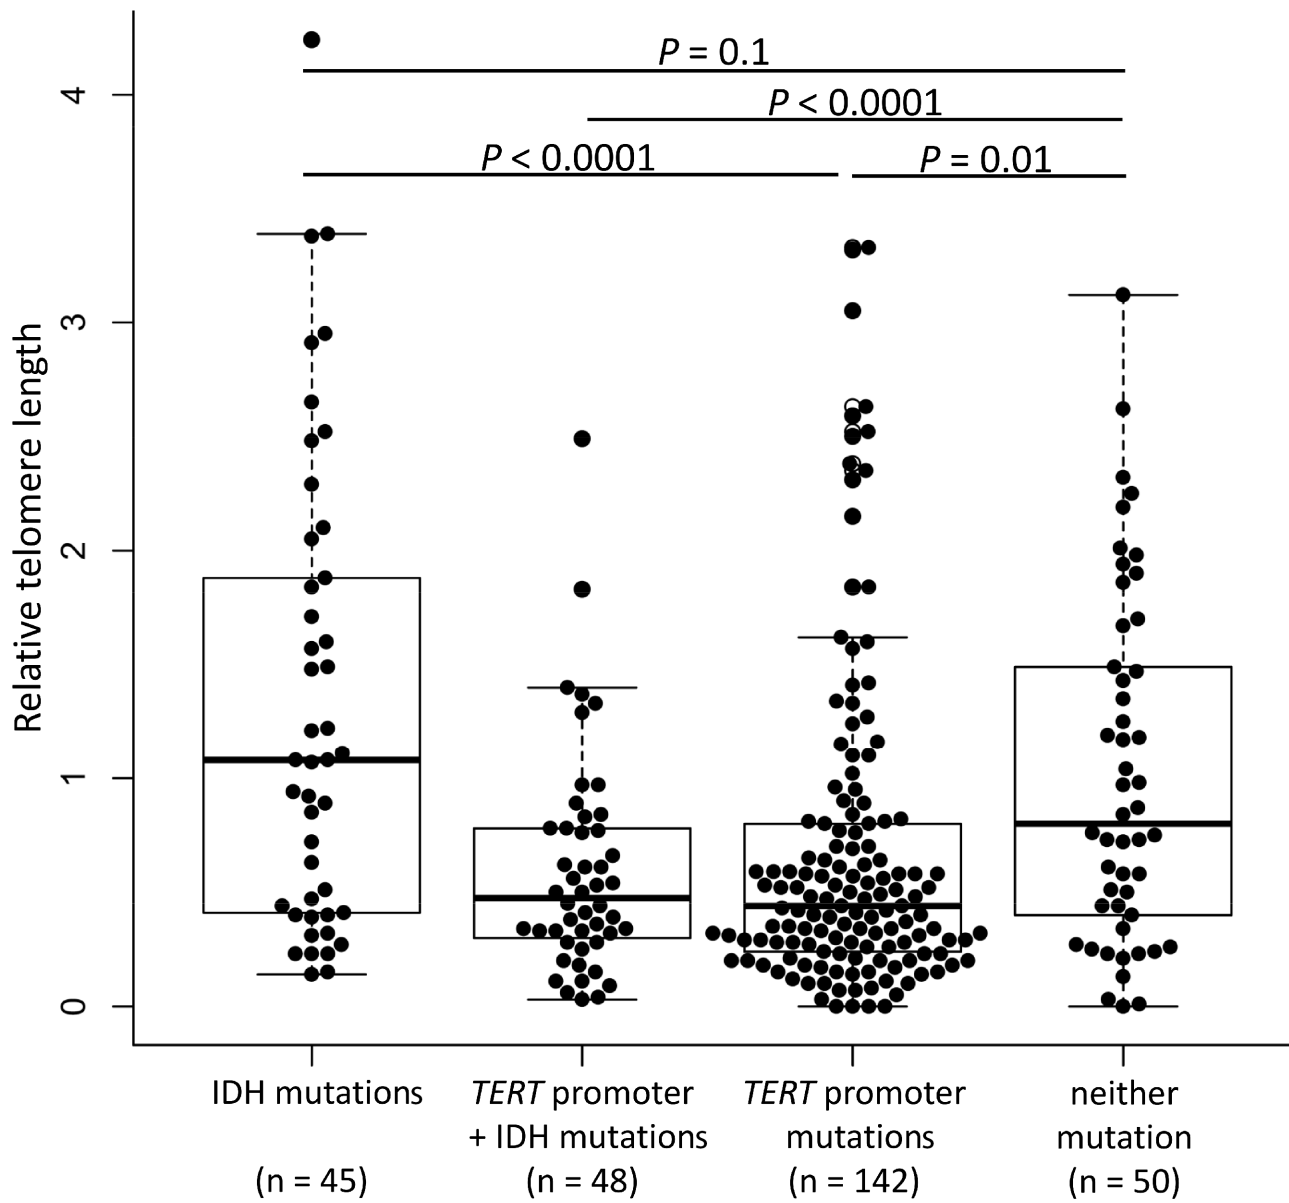

**Supplementary Figure 2: Relative telomere lengths in glioma samples according to mutation status of IDH and the *TERT* promoter.** Comparison of relative telomere lengths in gliomas with and without mutations in *IDH* and the *TERT* promoter, respectively. Experiments were carried out in triplicate and box plots represent mean  $\pm$  s.e.m. *P*-values were determined by *t*-test.

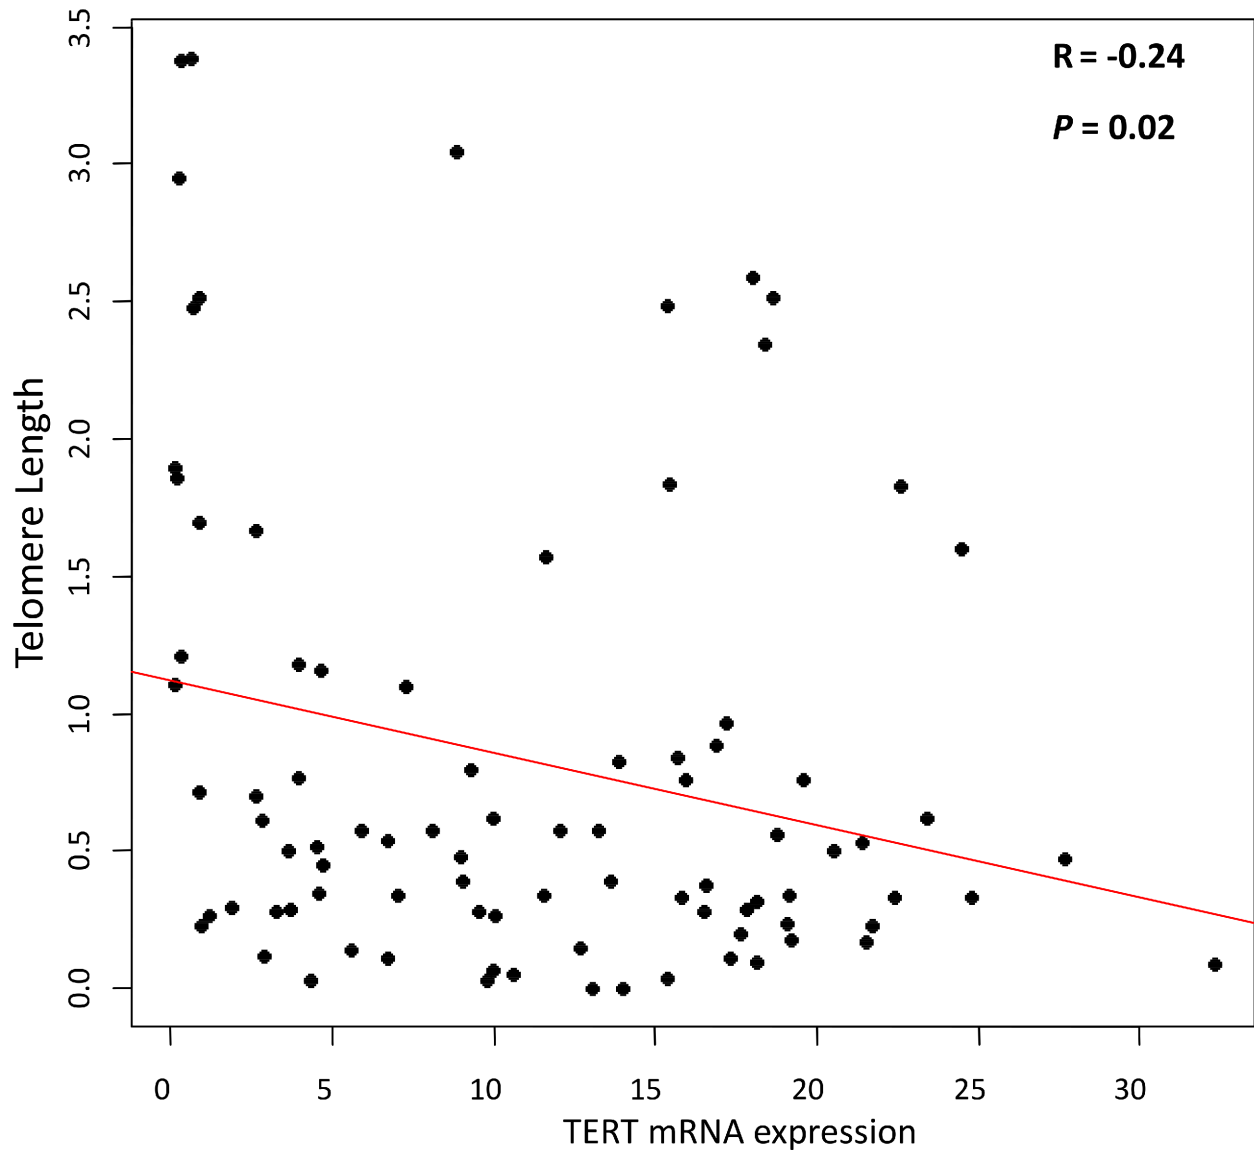

**Supplementary Figure 3: Correlation between telomere length and TERT mRNA expression.** Investigation of correlation using linear regression between relative telomere length and relative TERT mRNA expression for tumors where both values were available ( $n = 88$ ). *P*-values were determined by ANOVA.

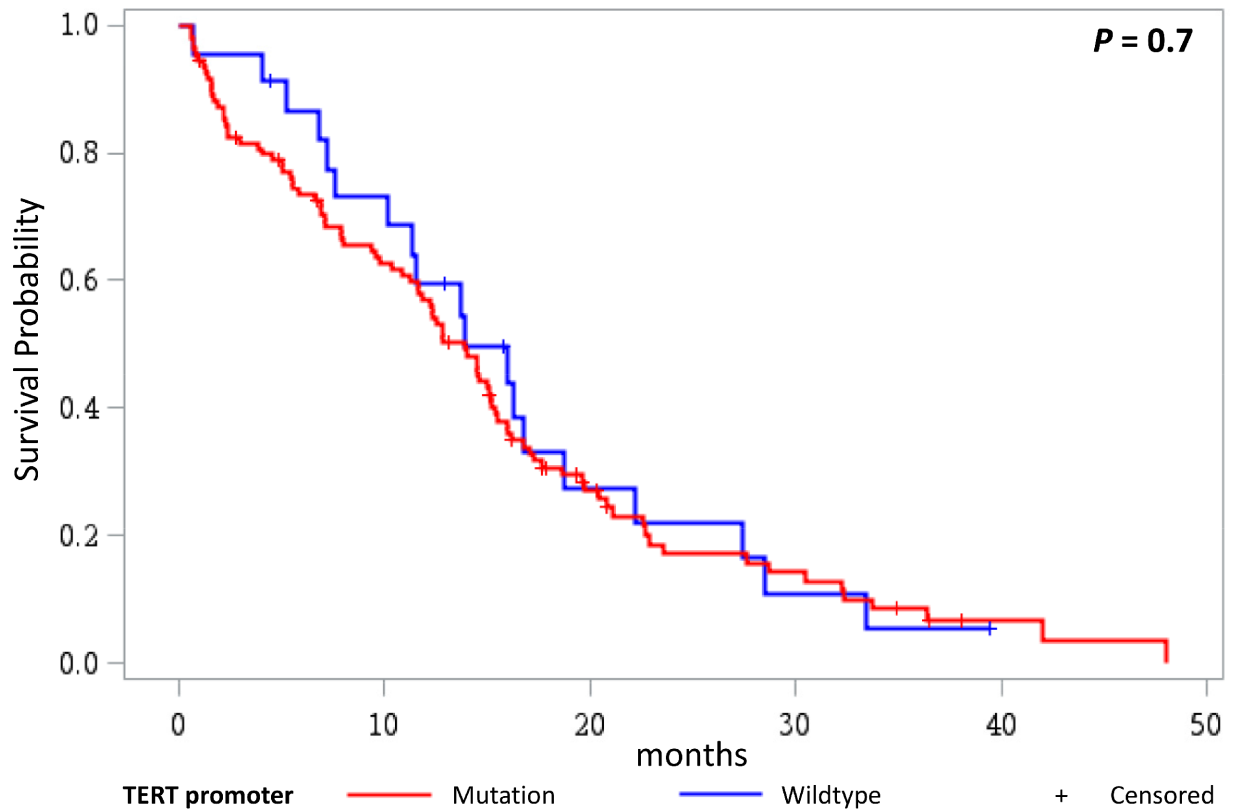

|              | Total      | Failed     | censored  |
|--------------|------------|------------|-----------|
| TERTmut      | 111        | 91         | 20        |
| TERTwt       | 23         | 19         | 4         |
| <b>Total</b> | <b>134</b> | <b>110</b> | <b>24</b> |

Supplementary Figure 4: Overall survival in patients with primary glioblastoma according to *TERT* promoter status.

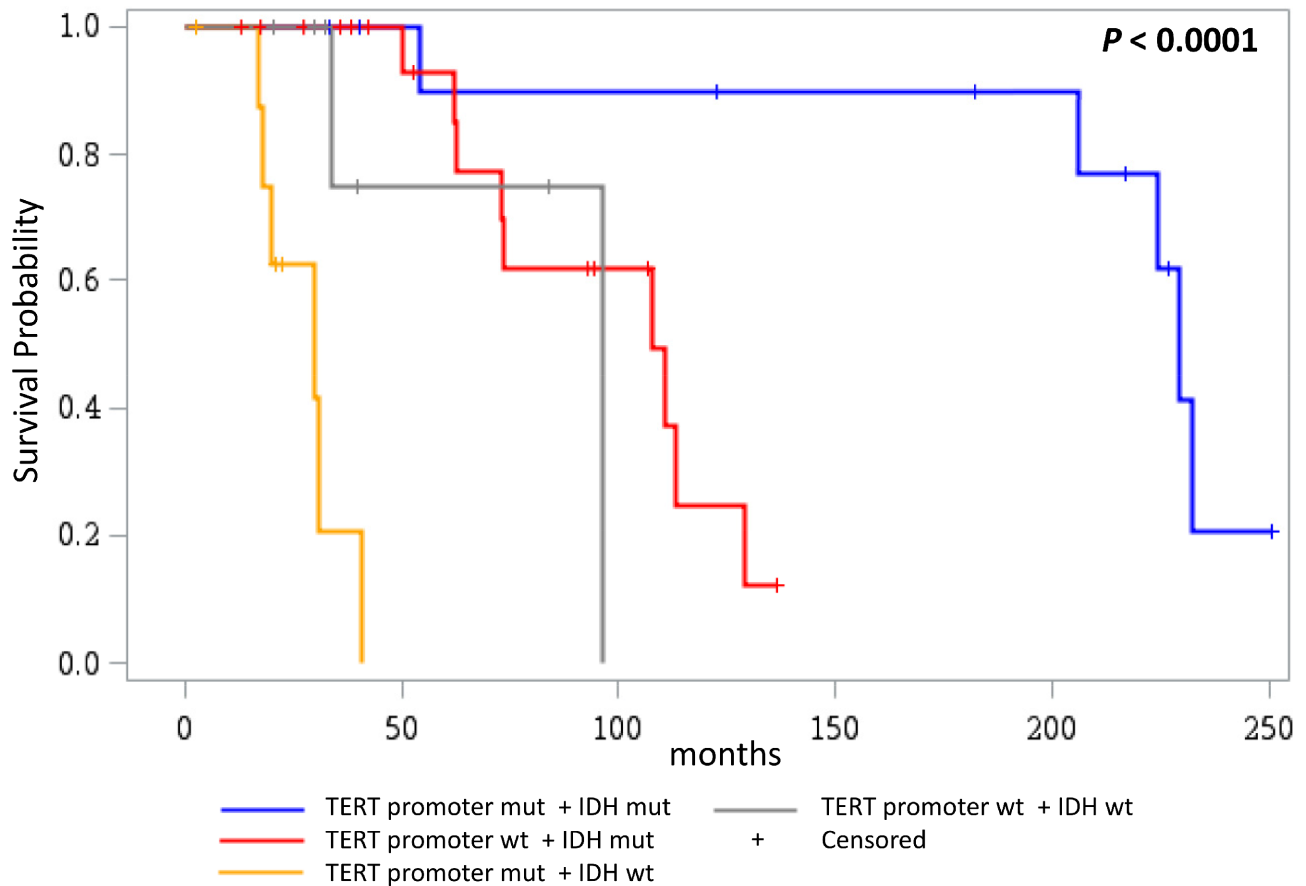

|                  | Total     | Failed    | censored  |
|------------------|-----------|-----------|-----------|
| TERTmut + IDHmut | 13        | 5         | 8         |
| TERTwt + IDHmut  | 21        | 9         | 12        |
| TERTmut + IDHwt  | 9         | 6         | 3         |
| TERTwt + IDHwt   | 7         | 2         | 5         |
| <b>Total</b>     | <b>50</b> | <b>22</b> | <b>28</b> |

Supplementary Figure 5: Overall survival according to combined status of *TERT* promoter and *IDH* mutation in patients with astrocytoma.

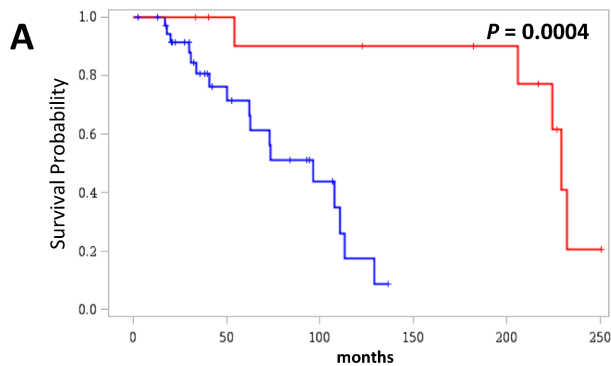

1p/19q — Deletion — Wildtype + Censored

| 1p/19q       | Total     | Failed    | censored  |
|--------------|-----------|-----------|-----------|
| wt           | 38        | 17        | 21        |
| deletion     | 12        | 5         | 7         |
| <b>Total</b> | <b>50</b> | <b>22</b> | <b>28</b> |

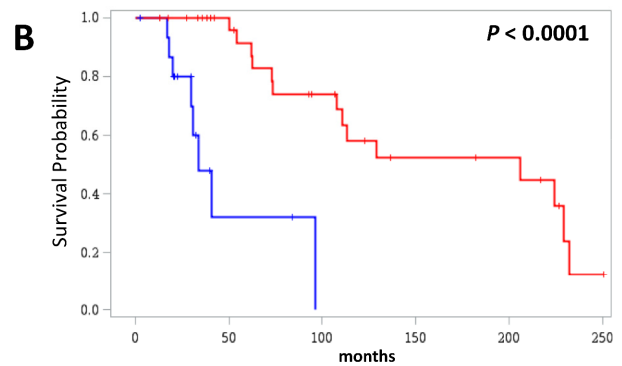

IDH — Mutation — Wildtype + Censored

| IDH          | Total     | Failed    | censored  |
|--------------|-----------|-----------|-----------|
| wt           | 16        | 8         | 8         |
| mut          | 34        | 14        | 20        |
| <b>Total</b> | <b>50</b> | <b>22</b> | <b>28</b> |

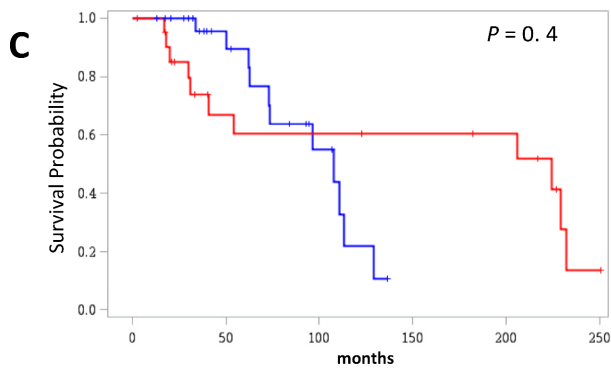

TERT prom. — Mutation — Wildtype + Censored

| TERT         | Total     | Failed    | censored  |
|--------------|-----------|-----------|-----------|
| wt           | 28        | 11        | 17        |
| mut          | 22        | 11        | 11        |
| <b>Total</b> | <b>50</b> | <b>22</b> | <b>28</b> |

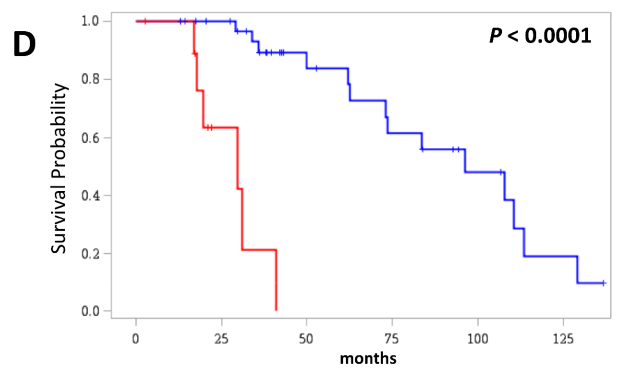

TERT prom. — Mutation — Wildtype + Censored

| TERT *       | Total     | Failed    | censored  |
|--------------|-----------|-----------|-----------|
| wt           | 28        | 11        | 17        |
| mut          | 10        | 6         | 4         |
| <b>Total</b> | <b>38</b> | <b>17</b> | <b>21</b> |

**Supplementary Figure 6: Overall survival in patients with astrocytoma according to alterations in the *TERT* promoter, *IDH* and at 1p/19q.** Kaplan Meier analysis of differences in overall survival in astrocytoma patients stratified according to (A) co-deletions in 1p/19q, (B) *IDH* mutations and (C) *TERT* promoter mutations. (D) To assess the effect of *TERT* promoter mutations without the influence of 1p/19q co-deletions, patients that carried the co-deletions were removed from the analysis and survival analysis stratified by *TERT* promoter mutations was repeated. \*Analysis of survival of patients with *TERT* promoter mutations and without 1p/19q co-deletions.

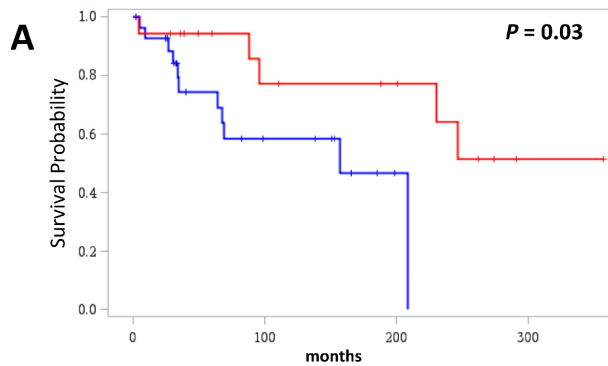

| 1p/19q       | Total     | Failed    | censored  |
|--------------|-----------|-----------|-----------|
| wt           | 28        | 11        | 17        |
| deletion     | 17        | 5         | 12        |
| <b>Total</b> | <b>45</b> | <b>16</b> | <b>29</b> |

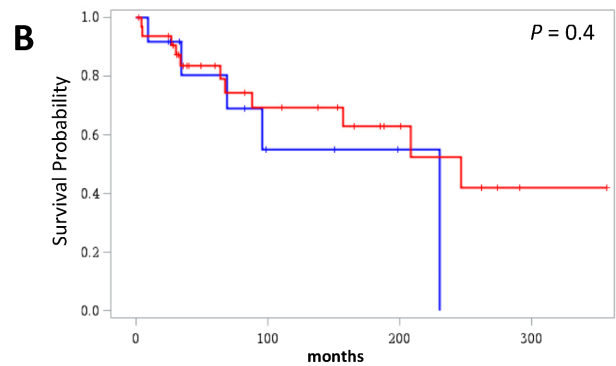

| IDH          | Total     | Failed    | censored  |
|--------------|-----------|-----------|-----------|
| wt           | 12        | 5         | 7         |
| mut          | 33        | 11        | 22        |
| <b>Total</b> | <b>45</b> | <b>16</b> | <b>29</b> |

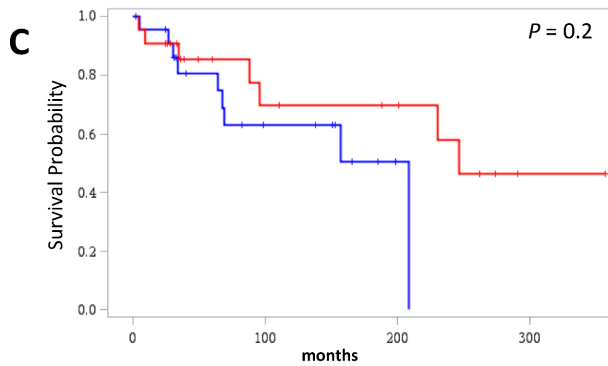

| TERT         | Total     | Failed    | censored  |
|--------------|-----------|-----------|-----------|
| wt           | 23        | 9         | 14        |
| mut          | 22        | 7         | 15        |
| <b>Total</b> | <b>45</b> | <b>16</b> | <b>29</b> |

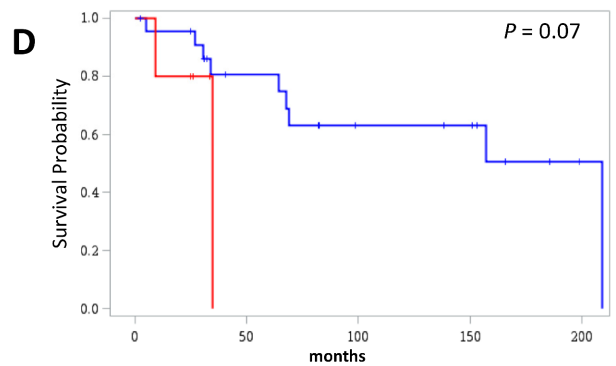

| TERT *       | Total     | Failed    | censored  |
|--------------|-----------|-----------|-----------|
| wt           | 23        | 9         | 14        |
| mut          | 5         | 2         | 3         |
| <b>Total</b> | <b>28</b> | <b>11</b> | <b>17</b> |

**Supplementary Figure 7: Overall survival in patients with oligoastrocytoma according to alterations in the *TERT* promoter, *IDH* and at 1p/19q.** Kaplan Meier analysis of differences in overall survival in patients with oligoastrocytoma stratified according to (A) co-deletions in 1p/19q, (B) *IDH* mutations and (C) *TERT* promoter mutations. (D) To assess the effect of *TERT* promoter mutations without the influence of 1p/19q co-deletions, patients that carried the co-deletions were removed from the analysis and survival analysis stratified by *TERT* promoter mutations was repeated. \*Analysis of survival of patients with *TERT* promoter mutations and without 1p/19q co-deletions.

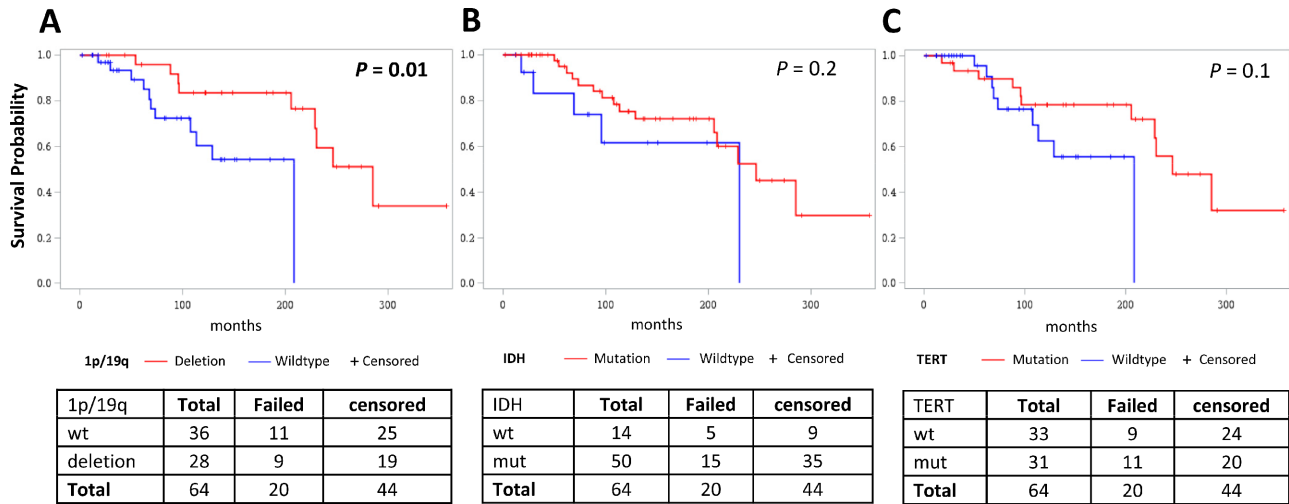

**Supplementary Figure 8: Overall survival in patients with low grade gliomas according to alterations in the *TERT* promoter, *IDH* and at 1p/19q.** Kaplan Meier analysis of differences in overall survival in patients with low grade gliomas (grade II), including astrocytomas, oligoastrocytomas and oligodendrogliomas. For survival analysis patients were stratified according to (A) co-deletions in 1p/19q, (B) *IDH* mutations and (C) *TERT* promoter mutations. In (C) *TERT* promoter mutations seem to confer a better survival, however, this association is due to co-occurrence with 1p/19q co-deletions. In low grade gliomas only three patients harboured *TERT* promoter mutations without 1p/19q co-deletions in their tumors.

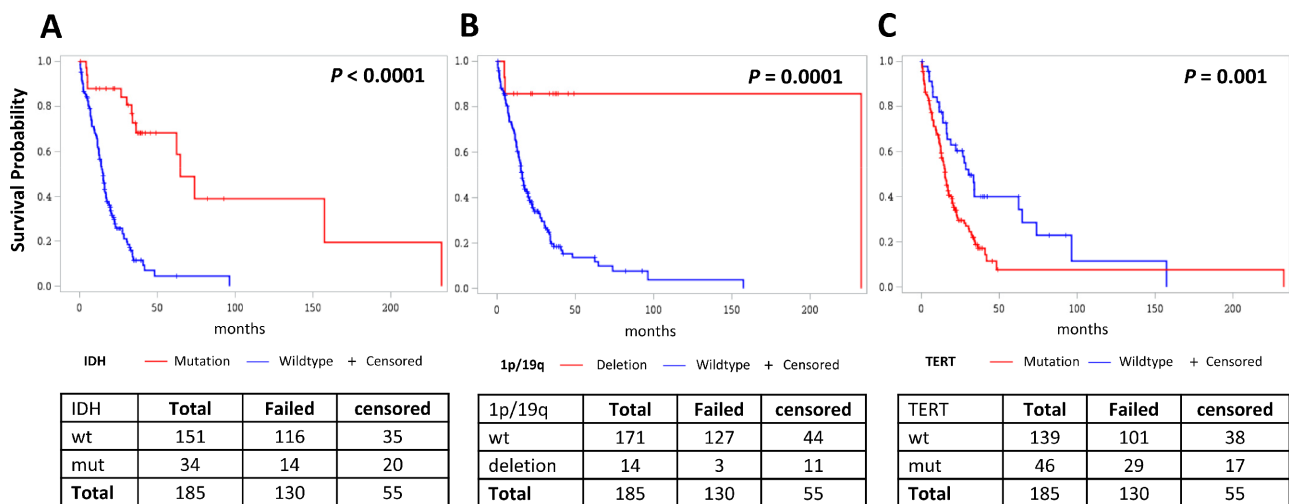

**Supplementary Figure 9: Overall survival in patients with high grade gliomas according to alterations in the *TERT* promoter, *IDH* and at 1p/19q.**



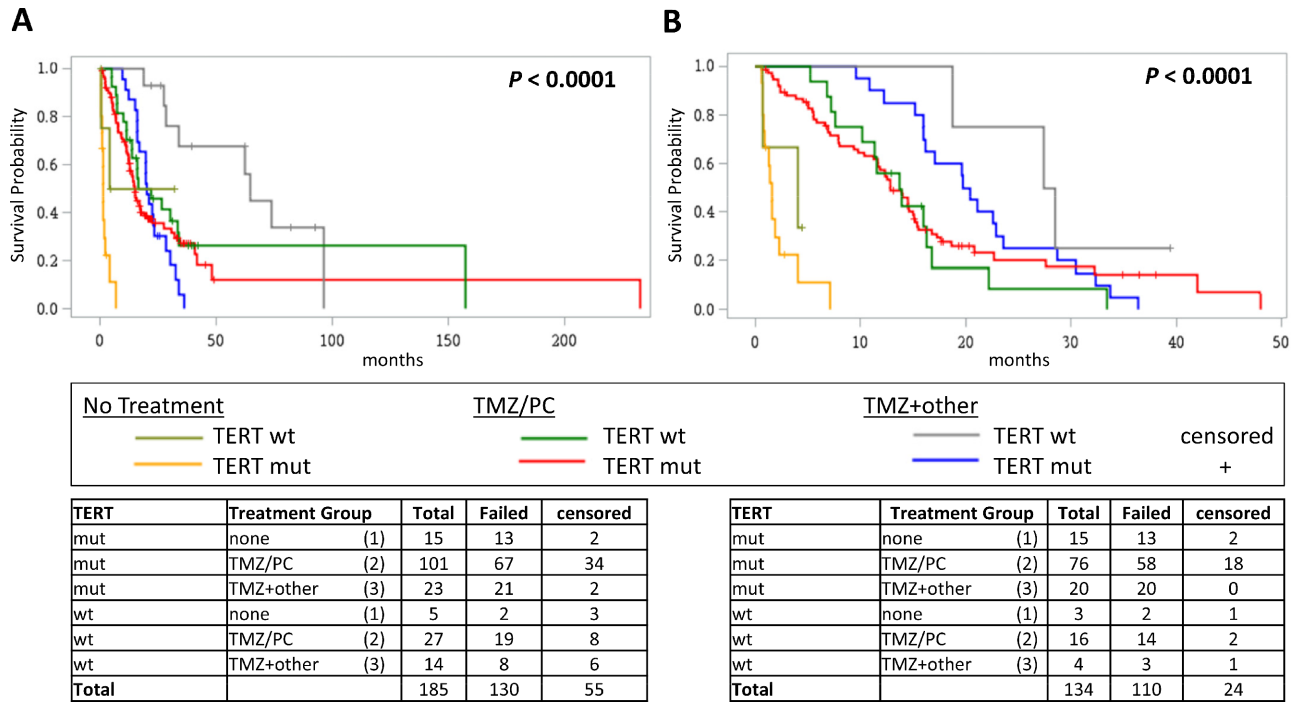

**Supplementary Figure 10: Overall survival in glioma patients according to different treatment regimens.** Kaplan Meier analysis of overall survival in glioma patients receiving different treatment regimens and additionally stratified according to their *TERT* promoter mutational status. Patients were stratified into three groups, where group 1) did not receive any treatment, group 2) received radiotherapy alone or in combination with PC or TMZ and group 3) received TMZ and radiotherapy combined with a third adjuvant. Survival analysis then was performed according to the different treatment groups and the *TERT* promoter mutational status in (A) the complete set of glioma patients and (B) patients with primary glioblastomas.

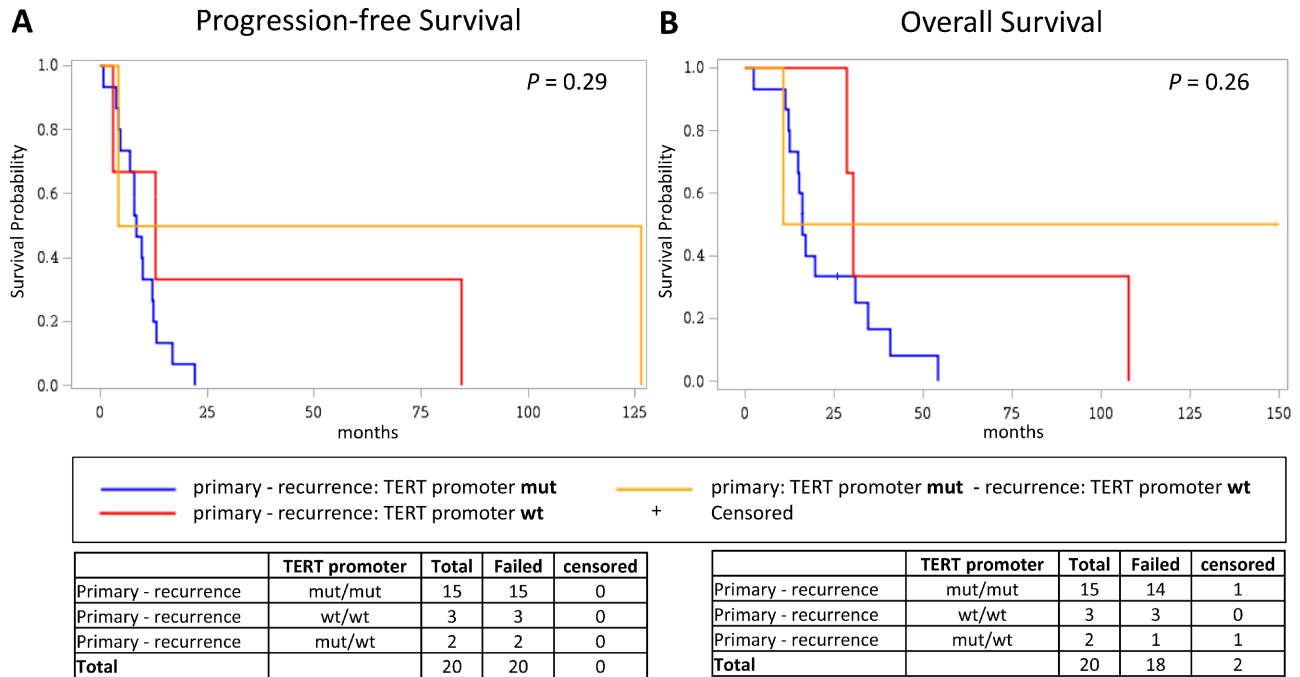

**Supplementary Figure 11: Survival analysis in patients with primary tumors and recurrences.** Analysis of (A) progression-free and (B) overall survival in patients for whom information about their primary glioma tumor and corresponding recurrence was available. Patients were grouped according to *TERT* promoter mutations, where both primary and recurrence carried *TERT* promoter mutations or both lesions did not carry the mutations. A third group consisted of the two patients that showed *TERT* promoter mutations in their primary tumors but were wildtype in corresponding recurrences.

**Supplementary Table 1: Distribution of clinical parameters and mutations in different histological classifications**

|                                | All            | Astrocytomas  | Oligoastrocytomas | Oligodendrogliomas | Primary Glioblastomas |
|--------------------------------|----------------|---------------|-------------------|--------------------|-----------------------|
|                                | <i>n</i> = 303 | <i>n</i> = 56 | <i>n</i> = 55     | <i>n</i> = 27      | <i>n</i> = 165        |
| Gender                         |                |               |                   |                    |                       |
| male                           | 192            | 38            | 34                | 13                 | 107                   |
| female                         | 111            | 18            | 21                | 14                 | 58                    |
| Age                            |                |               |                   |                    |                       |
| ≤ 55                           | 152            | 48            | 47                | 19                 | 38                    |
| > 55                           | 151            | 8             | 8                 | 8                  | 127                   |
| Grade                          |                |               |                   |                    |                       |
| low (II)                       | 78             | 33            | 34                | 11                 | 0                     |
| high (III + IV)                | 225            | 23            | 21                | 16                 | 165                   |
| <i>IDH</i>                     |                |               |                   |                    |                       |
| wildtype                       | 203            | 19            | 16                | 11                 | 157                   |
| mutation                       | 100            | 37            | 39                | 16                 | 8                     |
| 9p21                           |                |               |                   |                    |                       |
| wildtype                       | 138            | 30            | 34                | 16                 | 58                    |
| mutation                       | 119            | 17            | 13                | 9                  | 80                    |
| missing                        | 46             | 9             | 8                 | 2                  | 27                    |
| Deletions at 1p and/<br>or 19q |                |               |                   |                    |                       |
| wildtype                       | 185            | 34            | 23                | 11                 | 117                   |
| deletion                       | 74             | 15            | 24                | 14                 | 21                    |
| missing                        | 44             | 7             | 8                 | 2                  | 27                    |
| 1p/19q codeletions             |                |               |                   |                    |                       |
| wildtype                       | 214            | 39            | 28                | 11                 | 136                   |
| codeletion                     | 45             | 10            | 19                | 14                 | 2                     |
| missing                        | 44             | 7             | 8                 | 2                  | 27                    |

**Supplementary Table 2: Association of *TERT* promoter mutations with mutations in *IDH1/2* and deletions at 9p21 and 1p19q in different glioma subtypes**

|                                              | Astrocytomas                                                   |          | Oligoastrocytomas                                                  |          | Oligodendrogliomas                                              |          | Primary Glioblastomas                                        |          |
|----------------------------------------------|----------------------------------------------------------------|----------|--------------------------------------------------------------------|----------|-----------------------------------------------------------------|----------|--------------------------------------------------------------|----------|
|                                              | <i>n</i> = 56                                                  |          | <i>n</i> = 55                                                      |          | <i>n</i> = 27                                                   |          | <i>n</i> = 165                                               |          |
|                                              | <i>TERT</i> promoter                                           |          | <i>TERT</i> promoter                                               |          | <i>TERT</i> promoter                                            |          | <i>TERT</i> promoter                                         |          |
|                                              | wildtype                                                       | mutation | wildtype                                                           | mutation | wildtype                                                        | mutation | wildtype                                                     | mutation |
| <b><i>IDH</i></b><br>wildtype<br>mutation    | 10<br>24                                                       | 9<br>13  | 8<br>21                                                            | 8<br>18  | 7<br>1                                                          | 4<br>15  | 28<br>5                                                      | 129<br>3 |
|                                              | OR = 0.60; 95% CI<br>0.20 – 1.85;<br><i>P</i> = 0.37           |          | OR = 0.86; 95% CI<br>0.27 – 2.75;<br><i>P</i> = 0.8                |          | OR = 26.25; 95% CI<br>2.46 – 280.20;<br><b><i>P</i> = 0.001</b> |          | OR = 0.13; 95% CI<br>0.03 – 0.58;<br><b><i>P</i> = 0.002</b> |          |
| <b>9p21</b><br>Wildtype<br>mutation          | 21<br>7                                                        | 9<br>10  | 18<br>5                                                            | 16<br>8  | 5<br>2                                                          | 11<br>7  | 16<br>10                                                     | 42<br>70 |
|                                              | OR = 3.33; 95% CI<br>0.96 – 11.54;<br><b><i>P</i> = 0.05</b>   |          | OR = 1.80; 95% CI<br>0.49 – 6.64;<br><i>P</i> = 0.4                |          | OR = 1.60; 95% CI<br>0.24 – 10.57;<br><i>P</i> = 0.6            |          | OR = 2.67; 95% CI<br>1.11 – 6.42;<br><b><i>P</i> = 0.03</b>  |          |
| <b>1p and/or 19q</b><br>Wildtype<br>deletion | 26<br>3                                                        | 8<br>12  | 18<br>5                                                            | 5<br>19  | 7<br>0                                                          | 4<br>14  | 22<br>4                                                      | 95<br>17 |
|                                              | OR = 13.0; 95% CI<br>2.92 – 57.85;<br><b><i>P</i> = 0.0002</b> |          | OR = 13.70; 95% CI<br>3.38 – 55.32;<br><b><i>P</i> &lt; 0.0001</b> |          | OR = 4.50; 95% CI<br>1.90 – 10.68;<br><b><i>P</i> = 0.0004</b>  |          | OR = 0.98; 95% CI<br>0.30 – 3.22;<br><i>P</i> = 1.0          |          |
| <b>1p/19q</b><br>wildtype<br>codeletion      | 29<br>0                                                        | 10<br>10 | 23<br>0                                                            | 5<br>19  | 7<br>0                                                          | 4<br>14  | 26<br>110                                                    | 0<br>2   |
|                                              | OR = 2.00; 95% CI<br>1.29 – 3.10;<br><i>P</i> < 0.0001         |          | OR = 4.80; 95% CI<br>2.20 – 10.47;<br><b><i>P</i> &lt; 0.0001</b>  |          | OR = 4.50; 95% CI<br>1.90 – 10.68;<br><b><i>P</i> = 0.0004</b>  |          | OR = 1.2; 95% CI<br>1.0 – 1.04;<br><i>P</i> = 0.5            |          |

*P*-values were derived from  $\chi^2$ -test and considered statistically significant if < 0.05.

**Bold font** indicates statistical significance.

**Supplementary Table 3: Multivariate Model in complete set of Gliomas grouped according to *TERT* promoter and *IDH* status**

| Parameter         |                 | <i>P</i>          | HR           | 95% CI       |              |
|-------------------|-----------------|-------------------|--------------|--------------|--------------|
| Group             | <i>TERT+IDH</i> | <b>0.03</b>       | <b>0.22</b>  | <b>0.08</b>  | <b>0.59</b>  |
| Group             | <i>IDH</i>      | 0.72              | 1.14         | 0.56         | 2.36         |
| Group             | <i>TERT</i>     | 0.78              | 0.93         | 0.55         | 1.56         |
| Age               |                 | <b>&lt; .0001</b> | <b>1.04</b>  | <b>1.02</b>  | <b>1.06</b>  |
| Grade             | III             | <b>&lt; .0001</b> | <b>5.22</b>  | <b>2.41</b>  | <b>11.33</b> |
| Grade             | IV              | <b>&lt; .0001</b> | <b>32.92</b> | <b>12.89</b> | <b>84.04</b> |
| <i>CDKN2A/B</i>   | Deletion        | 0.43              | 1.15         | 0.81         | 1.64         |
| Treatment - Group | PC              | 0.23              | 1.79         | 0.7          | 4.61         |
| Treatment - Group | RT              | 0.06              | 1.75         | 0.99         | 3.12         |
| Treatment - Group | TMZ+ot          | 0.72              | 0.93         | 0.61         | 1.41         |
| Treatment - Group | none            | <b>&lt; .0001</b> | <b>5.61</b>  | <b>2.94</b>  | <b>10.72</b> |

**Supplementary Table 4: Multivariate Model in Astrocytomas grouped according to *TERT* promoter and *IDH* status**

| Parameter         |                 | <i>P</i>    | HR           | 95% CI      |               |
|-------------------|-----------------|-------------|--------------|-------------|---------------|
| group             | <i>TERT+IDH</i> | 0.02        | 0.02         | 0.001       | 0.54          |
| group             | <i>IDH</i>      | 0.42        | 0.35         | 0.03        | 4.33          |
| group             | <i>TERT</i>     | <b>0.02</b> | <b>37.67</b> | <b>1.63</b> | <b>870.82</b> |
| Age               |                 | 0.11        | 1.06         | 1.00        | 1.13          |
| Grade             | III             | 0.23        | 0.35         | 0.07        | 1.91          |
| Grade             | IV              | 0.58        | 0.40         | 0.01        | 10.89         |
| <i>CDKN2A/B</i>   | Deletion        | <b>0.01</b> | <b>6.11</b>  | <b>1.47</b> | <b>25.37</b>  |
| Treatment - Group | PC              | 1.00        | 0.00         | 0.00        | -             |
| Treatment - Group | RT              | 0.24        | 7.38         | 0.27        | 201.46        |
| Treatment - Group | TMZ+ot          | 0.25        | 2.69         | 0.50        | 14.47         |
| Treatment - Group | none            | 0.99        | 0.00         | 0.00        | -             |

**Supplementary Table 5: Multivariate Model in Astrocytomas**

| Parameter            |          | <i>P</i>     | HR           | 95% CI      |               |
|----------------------|----------|--------------|--------------|-------------|---------------|
| <i>TERT</i> promoter | Mutation | <b>0.02</b>  | <b>37.65</b> | <b>1.63</b> | <b>869.91</b> |
| <i>IDH</i>           | Mutation | 0.42         | 0.35         | 0.03        | 4.32          |
| 1p/19q co-deletion   | Deletion | <b>0.002</b> | <b>0.002</b> | <b>0.00</b> | <b>0.09</b>   |
| <i>CDKN2A/B</i>      | Deletion | <b>0.01</b>  | <b>6.12</b>  | <b>1.48</b> | <b>25.37</b>  |
| Age                  |          | 0.11         | 1.06         | 0.99        | 1.13          |
| Grade                | III      | 0.22         | 0.35         | 0.07        | 1.90          |
| Grade                | IV       | 0.58         | 0.40         | 0.01        | 10.88         |
| Treatment – Group*   | RT       | 0.24         | 7.38         | 0.27        | 201.53        |
| Treatment – Group*   | TMZ+ot   | 0.25         | 2.69         | 0.50        | 14.48         |

\*excluded from analysis: treatment types: PC ( $n = 1$ ), None ( $n = 7$ )

**Supplementary Table 6: Multivariate Model in Oligoastrocytomas**

| Parameter            |          | <i>P</i>    | HR           | 95% CI      |               |
|----------------------|----------|-------------|--------------|-------------|---------------|
| <i>TERT</i> promoter | Mutation | 0.62        | 2.05         | 0.12        | 35.50         |
| <i>IDH</i>           | Mutation | 0.27        | 0.16         | 0.01        | 3.98          |
| 1p/19q co-deletion   | Deletion | 0.54        | 0.57         | 0.09        | 3.75          |
| <i>CDKN2A/B</i>      | Deletion | <b>0.05</b> | <b>0.19</b>  | <b>0.04</b> | <b>1.02</b>   |
| Age                  |          | 0.10        | 1.06         | 0.99        | 1.14          |
| Grade                | III      | <b>0.02</b> | <b>16.45</b> | <b>1.64</b> | <b>165.01</b> |
| Treatment - Group*   | PC       | 0.60        | 0.68         | 0.16        | 2.84          |
| Treatment - Group*   | RT       | 0.33        | 0.30         | 0.03        | 3.46          |
| Treatment - Group*   | TMZ+ot   | 0.20        | 0.27         | 0.04        | 1.96          |

\*excluded from analysis: treatment types: None ( $n = 4$ )

**Supplementary Table 7: Multivariate Model in Oligoastrocytomas (Exclusion of 1p/19q co-deletions)**

| Parameter            |          | <i>P</i> | HR    | 95% CI |        |
|----------------------|----------|----------|-------|--------|--------|
| <i>TERT</i> promoter | Mutation | 0.75     | 1.90  | 0.04   | 89.68  |
| <i>IDH</i>           | Mutation | 0.82     | 0.67  | 0.02   | 19.88  |
| <i>CDKN2A/B</i>      | Deletion | 0.47     | 0.50  | 0.07   | 3.37   |
| Age                  |          | 0.24     | 1.07  | 0.96   | 1.19   |
| Grade                | III      | 0.12     | 11.37 | 0.53   | 242.59 |
| Grade                | IV       | 0.32     | 0.34  | 0.04   | 2.88   |
| Treatment - Group    | RT       | 0.79     | 1.60  | 0.05   | 48.49  |
| Treatment - Group    | TMZ+ot   | 0.34     | 0.40  | 0.06   | 2.65   |

**Supplementary Table 8: Multivariate Model in Low Grade Gliomas\***

| Parameter         |          | P           | HR          | 95% CI      |             |
|-------------------|----------|-------------|-------------|-------------|-------------|
| TERT promoter     | Mutation | 0.03        | 0.24*       | 0.07        | 0.87        |
| IDH               | Mutation | 0.74        | 0.79        | 0.20        | 3.14        |
| CDKN2A/B          | Deletion | 0.23        | 0.20        | 0.65        | 6.03        |
| Age               |          | <b>0.02</b> | <b>1.08</b> | <b>1.01</b> | <b>1.14</b> |
| Treatment - Group | PC       | 0.53        | 0.60        | 0.12        | 2.94        |
| Treatment - Group | RT       | 0.26        | 0.26        | 0.04        | 1.86        |
| Treatment - Group | TMZ+ot   | 1.21        | 1.21        | 0.28        | 5.18        |

\*HR could not be calculated when 1p19q was included, resulting in a misleadingly negative HR for TERT promoter mutations

**Supplementary Table 9: Multivariate Model in High Grade Gliomas**

| Parameter          |          | P                 | HR          | 95% CI      |              |
|--------------------|----------|-------------------|-------------|-------------|--------------|
| TERT promoter      | Mutation | 0.16              | 1.49        | 0.86        | 2.59         |
| 1p/19q co-deletion | Deletion | <b>0.003</b>      | <b>0.09</b> | <b>0.02</b> | <b>0.44</b>  |
| IDH                | Mutation | 0.67              | 0.84        | 0.37        | 1.89         |
| CDKN2A/B           | Deletion | 0.61              | 0.91        | 0.62        | 1.33         |
| Treatment - Group  | PC       | 0.66              | 0.76        | 0.23        | 2.53         |
| Treatment - Group  | RT       | 0.28              | 1.39        | 0.76        | 2.53         |
| Treatment - Group  | TMZ+ot   | 0.22              | 0.75        | 0.47        | 1.19         |
| Treatment - Group  | none     | <b>&lt; .0001</b> | <b>9.58</b> | <b>4.99</b> | <b>18.40</b> |
| Age                |          | <b>&lt; .0001</b> | <b>1.05</b> | <b>1.03</b> | <b>1.06</b>  |

**Supplementary Table 10: Comparison of genetic alterations in primary glioma tumors and matched recurrences**

| Primary tumor | CDKN2A/B              | 1p/19q                           | IDH        | TERT promoter | rs2853669 | Histology at primary diagnosis |
|---------------|-----------------------|----------------------------------|------------|---------------|-----------|--------------------------------|
| Recurrence    |                       |                                  |            |               |           | Histology final                |
| BT-121        | deletion <sup>a</sup> | partial 1p deletion <sup>m</sup> | wt         | -124C > T     | TT        | glioblastoma WHO grade IV      |
| BT-121R1      | deletion <sup>a</sup> | partial 1p deletion <sup>m</sup> | wt         | -124C > T     | TT        | glioblastoma WHO grade IV      |
| BT-123        | deletion <sup>a</sup> | co-deletion 1p19q <sup>d</sup>   | c.395G > A | -124C > T     | CC        | oligoastrocytoma WHO grade III |
| BT-123R1      | deletion <sup>a</sup> | co-deletion 1p19q <sup>d</sup>   | c.395G > A | -124C > T     | CC        | oligoastrocytoma WHO grade III |
| BT-123R2      | deletion <sup>a</sup> | co-deletion 1p19q <sup>d</sup>   | c.395G > A | -124C > T     | CC        | glioblastoma WHO grade IV      |
| BT-154        | wt                    | wt                               | wt         | -124C > T     | TT        | glioblastoma WHO grade IV      |
| BT-154R1      | wt                    | wt                               | wt         | -124C > T     | TT        | glioblastoma WHO grade IV      |

(Continued)

| Primary tumor       | <i>CDKN2A/B</i>       | 1p/19q                              | <i>IDH</i> | <i>TERT</i><br>promoter | rs2853669 | Histology at primary diagnosis                             |
|---------------------|-----------------------|-------------------------------------|------------|-------------------------|-----------|------------------------------------------------------------|
| Recurrence          |                       |                                     |            |                         |           | Histology final                                            |
| BT-159              | deletion <sup>a</sup> | wt                                  | wt         | -124C > T               | TT        | oligoastrocytoma WHO grade III                             |
| BT-159R1            | deletion <sup>a</sup> | wt                                  | wt         | -124C > T               | TT        | oligoastrocytoma WHO grade III                             |
| BT-159R2            | deletion <sup>a</sup> | wt                                  | wt         | -124C > T               | TT        | glioblastoma WHO grade IV                                  |
| BT-177              | deletion <sup>a</sup> | wt                                  | wt         | -124C > T               | CT        | oligoastrocytoma WHO grade III                             |
| BT-177R1            | deletion <sup>a</sup> | wt                                  | wt         | -124C > T               | CT        | glioblastoma WHO grade IV                                  |
| BT-185              | wt                    | wt                                  | wt         | wt                      | TT        | glioblastoma WHO grade IV                                  |
| BT-185R1            | wt                    | wt                                  | wt         | wt                      | TT        | glioblastoma WHO grade IV                                  |
| BT-200              | wt                    | wt                                  | wt         | -124C > T               | CC        | glioblastoma WHO grade IV                                  |
| BT-200R1            | wt                    | wt                                  | wt         | -124C > T               | CC        | glioblastoma WHO grade IV                                  |
| BT-215              | wt                    | wt                                  | c.395G > A | wt                      | CT        | anaplastic oligoastrocytoma<br>WHO grade III               |
| BT-215R1            | wt                    | wt                                  | c.395G > A | wt                      | CT        | glioblastoma WHO grade IV                                  |
| BT-220              | wt                    | wt                                  | c.395G > A | wt                      | CT        | glioblastoma WHO grade IV                                  |
| BT-220R1            | wt                    | wt                                  | c.395G > A | wt                      | CT        | glioblastoma WHO grade IV                                  |
| BT-222              | deletion <sup>a</sup> | wt                                  | wt         | -124C > T               | CT        | glioblastoma WHO grade IV                                  |
| BT-222R1            | deletion <sup>a</sup> | wt                                  | wt         | -124C > T               | CT        | glioblastoma WHO grade IV                                  |
| BT-264              | wt                    | wt                                  | wt         | -124C > T               | CT        | glioblastoma WHO grade IV                                  |
| BT-264R1            | wt                    | wt                                  | wt         | -124C > T               | CT        | glioblastoma WHO grade IV                                  |
| BT-266              | wt                    | wt                                  | wt         | -124C > T               | TT        | glioblastoma WHO grade IV                                  |
| BT-266R1<br>(BT364) | wt                    | wt                                  | wt         | -124C > T               | TT        | glioblastoma WHO grade IV                                  |
| BT-43               | deletion <sup>a</sup> | wt                                  | wt         | -146C > T               | TT        | glioblastoma WHO grade IV                                  |
| BT-43R1             | deletion <sup>a</sup> | wt                                  | wt         | -146C > T               | TT        | glioblastoma WHO grade IV                                  |
| BT-62               | wt                    | wt                                  | wt         | -146C > T               | TT        | glioblastoma WHO grade IV                                  |
| BT-62R1             | wt                    | wt                                  | wt         | -146C > T               | TT        | glioblastoma WHO grade IV                                  |
| BT-92               | deletion <sup>a</sup> | partial 1p<br>deletion <sup>k</sup> | wt         | -124C > T               | CT        | glioblastoma WHO grade IV                                  |
| BT-92R1             | deletion <sup>a</sup> | partial 1p<br>deletion <sup>k</sup> | wt         | -124C > T               | CT        | glioblastoma WHO grade IV                                  |
| BT-163              | deletion <sup>a</sup> | wt                                  | wt         | -124C > T               | CT        | glioblastoma WHO grade IV                                  |
| BT-163R1            | wt                    | wt                                  | wt         | wt                      | CT        | glioblastoma WHO grade IV;<br>necrosis, single tumor cells |
| BT-171              | deletion <sup>a</sup> | wt                                  | c.395G > A | -124C > T               | CC        | oligodendroglioma WHO grade II                             |
| BT-171R1            | wt                    | wt                                  | wt         | wt                      | CC        | anaplastic oligoastrocytoma,<br>WHO grade III              |
| BT-261              | deletion <sup>a</sup> | wt                                  | wt         | -124C > T               | CT        | glioblastoma WHO grade IV                                  |
| BT-261R1            | wt                    | wt                                  | wt         | -124C > T               | CT        | glioblastoma WHO grade IV                                  |
| BT-288              | wt                    | wt                                  | wt         | -146C > T               | CT        | glioblastoma WHO grade IV                                  |

(Continued)



| Primary tumor | <i>CDKN2A/B</i>       | 1p/19q                            | <i>IDH</i> | <i>TERT</i> promoter | rs2853669 | Histology at primary diagnosis        |
|---------------|-----------------------|-----------------------------------|------------|----------------------|-----------|---------------------------------------|
| Recurrence    |                       |                                   |            |                      |           | Histology final                       |
| BT-288R1      | wt                    | partial 19q deletion <sup>h</sup> | wt         | -146C > T            | CT        | glioblastoma WHO grade IV             |
| BT-56         | deletion <sup>a</sup> | wt                                | wt         | -124C > T            | TT        | anaplastic astrocytoma WHO grade III. |
| BT-56R1       | wt                    | wt                                | wt         | -124C > T            | TT        | glioblastoma WHO grade IV             |

<sup>a</sup>comprises MLPA probes for *CDKN2A-3*, *CDKN2A-2a*, *CDKN2A-1*, *CDKN2B-2*, *CDKN2B-1b*

<sup>d</sup>comprises MLPA probes for 1 p arm: *TNFRSF14-8*, *TP73-1*, *PARK7-7*, *MFN2-10*, *WNT4-2*, *PTAFR-4*, *PRDX1-7*, *PRDX1-2c*, *FAF1-4*, *CDKN2C-1*, *CDKN2C-3a*, *PPAP2B-2*, *MIR101-1-1*, *FUBP1-8*, *GTF2B-2*, *DPYD-1*, *NRAS-5*, *NOTCH2-5*; 19 q arm: *CCNE1-11*, *PDCD5-1*, *UPK1A-4*, *UPK1A-7*, *TGFB1-3*, *CIC-10*, *ZNF296-2*, *PPP1R15A-2*, *BAX-4*, *CHMP2A-4*, *CHMP2A-2*

<sup>h</sup>comprises MLPA probes for *TGFB1-3*, *CIC-10*, *ZNF296-2*, *PPP1R15A-2*, *BAX-4*, *CHMP2A-4*, *CHMP2A-2*

<sup>k</sup>comprises MLPA probes for *PARK7-7*, *CDKN2C-1*, *CDKN2C-3a*

<sup>m</sup>comprises MLPA probes for *PRDX1-7*, *PRDX1-2c*, *FAF1-4*, *CDKN2C-1*, *CDKN2C-3a*

**Supplementary Table 11: PCR conditions and primer sequences**

| Gene                                           | MgCl <sub>2</sub> concentration and additives | Size (bp) | Primer sequence                                                                                                                  | Annealing temperature |
|------------------------------------------------|-----------------------------------------------|-----------|----------------------------------------------------------------------------------------------------------------------------------|-----------------------|
| <b><i>TERT</i> promoter: -27 to -286</b>       |                                               |           |                                                                                                                                  |                       |
| forward<br>reverse                             | 2 mM MgCl <sub>2</sub> ;<br>5% Glycerol       | 260       | 5'CCCACGTGCGCAGCAGGAC3'<br>5'CTCCCAGTGGATTTCGCGGGC3'                                                                             | 60°C                  |
| <b><i>IDH1</i></b>                             |                                               |           |                                                                                                                                  |                       |
| forward<br>reverse                             | 1.5 mM MgCl <sub>2</sub> ;<br>5% Glycerol     | 286       | 5'TGGCGTCAAATGTGCCACTATC3'<br>5'ACACATACAAGTTGGAAATTT CTGGGC3'                                                                   | 53°C                  |
| <b><i>IDH2</i></b>                             |                                               |           |                                                                                                                                  |                       |
| forward<br>reverse                             | 1.5 mM MgCl <sub>2</sub> ;<br>5% Glycerol     | 373       | 5'AGGACCCCCGTCTGGCTGTG3'<br>5'CGGCCCGGTCTGCCACAAAG3'                                                                             | 61°C                  |
| <b>TERT mRNA expression</b>                    |                                               |           |                                                                                                                                  |                       |
| forward (TERT exon 3)<br>reverse (TERT exon 4) | 2.5 mM MgCl <sub>2</sub>                      | 145       | 5'CGGAAGAGTGTCTGGAGCAA3'<br>5'GGATGAAGCGGAGTCTGGA3'                                                                              | 60°C                  |
| <b>Telomere length measurement</b>             |                                               |           |                                                                                                                                  |                       |
| telg<br>telc                                   | -                                             | 79        | 5'ACACTAAGGTTTGGGTTTGGGTTTGGGTTTG<br>GGTTAGTGT3'<br>5'TGTTAGGTATCCCCTATCCCTATCCCTATCCCTA<br>TCCCTAACAA3'                         | 59°C                  |
| <b><i>ALB</i></b>                              |                                               |           |                                                                                                                                  |                       |
| albuger2<br>albdger2                           | -                                             | 98        | 5'CGGCGGCGGGCGGCGGGCT GGGCGGCC<br>ATGCTTTTCAGCTCT GCAAGTC3'<br>5'GCCCCGCCCCCGCCGCCCCGTCGCCGAGC<br>ATTAAGCTCTTTGG CAACGTAGGTTTC3' | 85°C                  |
